# Supplementary material for: Stability of the chaperonin system GroEL–GroES under extreme environmental conditions
Source: Royal Society of Chemistry journal article supplement (doi:10.1039/c9cp06468k), 2020-01-01
Supplement: c9cp06468k1.pdf [file c9cp06468k1.pdf]

## Supporting Information

**Table SI 1.** Spectroscopically determined unfolding temperature and van't Hoff enthalpy change (\*) of GroEL, GroES and the GroEL-GroES complex (molar ratio of 1:2) in the absence and presence of different salts and cosolvents at ambient pressure. For GroES, two structural transitions (denoted 1, 2) could be observed.

|                                                                                        | $T_u / ^\circ\text{C}$                 | $\Delta H_{\text{vH,u}} / \text{kJ mol}^{-1}$ |
|----------------------------------------------------------------------------------------|----------------------------------------|-----------------------------------------------|
| GroEL (buffer A)                                                                       | $69.1 \pm 0.2$                         | $998 \pm 61$                                  |
| GroEL (buffer A + 3 mM ADP)                                                            | $67.8 \pm 0.2$                         | $732 \pm 89$                                  |
| GroEL (buffer B)                                                                       | $72.0 \pm 0.6$                         | $821 \pm 84$                                  |
| GroEL (buffer B + 3 mM ATP)                                                            | $70.9 \pm 0.5$                         | $788 \pm 79$                                  |
| GroEL (buffer B + 3 mM ATP + 10 mM $\text{Mg}^{2+}$ )                                  | $70.6 \pm 0.4$                         | $835 \pm 37$                                  |
| GroEL (buffer B + 10 mM $\text{Mg}^{2+}$ )                                             | $71.8 \pm 0.6$                         | $916 \pm 77$                                  |
| GroEL (buffer B + 1 M $^{13}\text{C}$ -urea)                                           | $65.1 \pm 0.3$                         | $917 \pm 170$                                 |
| GroEL (buffer B + 1 M TMAO)                                                            | $73.7 \pm 0.6$                         | $732 \pm 91$                                  |
| GroES (buffer B)                                                                       | 1) $82.1 \pm 0.3$<br>2) $87.1 \pm 0.6$ | 1) $691 \pm 92$<br>2) $669 \pm 286$           |
| GroES (buffer B + 1 M $^{13}\text{C}$ -urea)                                           | 1) $80.0 \pm 1.2$<br>2) $83.5 \pm 1.0$ | 1) $829 \pm 141$<br>2) $1028 \pm 245$         |
| GroES (buffer B + 1 M TMAO)                                                            | 1) $84.8 \pm 1.2$<br>2) $87.8 \pm 0.6$ | 1) $822 \pm 133$<br>2) $671 \pm 132$          |
| GroEL-GroES (buffer B)                                                                 | $71.4 \pm 0.5$                         | $1007 \pm 144$                                |
| GroEL-GroES (buffer B + 3 mM ATP + 10 mM $\text{Mg}^{2+}$ + 1 M $^{13}\text{C}$ -urea) | $67.2 \pm 0.4$                         | $863 \pm 70$                                  |
| GroEL-GroES (buffer B + 3 mM ATP + 10 mM $\text{Mg}^{2+}$ + 1 M TMAO)                  | $75.9 \pm 0.5$                         | $879 \pm 61$                                  |

**Table SI 2.** Spectroscopically determined unfolding pressures,  $p_u$ , and volume change of (partial) unfolding,  $\Delta V_u$ , of GroES in the absence and presence of different cosolvents at 25 °C.

|                                              | $p_u / \text{bar}$ | $\Delta V_u / \text{cm}^3 \text{mol}^{-1}$ |
|----------------------------------------------|--------------------|--------------------------------------------|
| GroES (buffer B)                             | $5395 \pm 298$     | $-52.9 \pm 11.8$                           |
| GroES (buffer B + 1 M TMAO)                  | $5413 \pm 321$     | $-54.8 \pm 7.8$                            |
| GroES (buffer B + 1 M $^{13}\text{C}$ -urea) | $3552 \pm 85$      | $-112.28 \pm 14.6$                         |

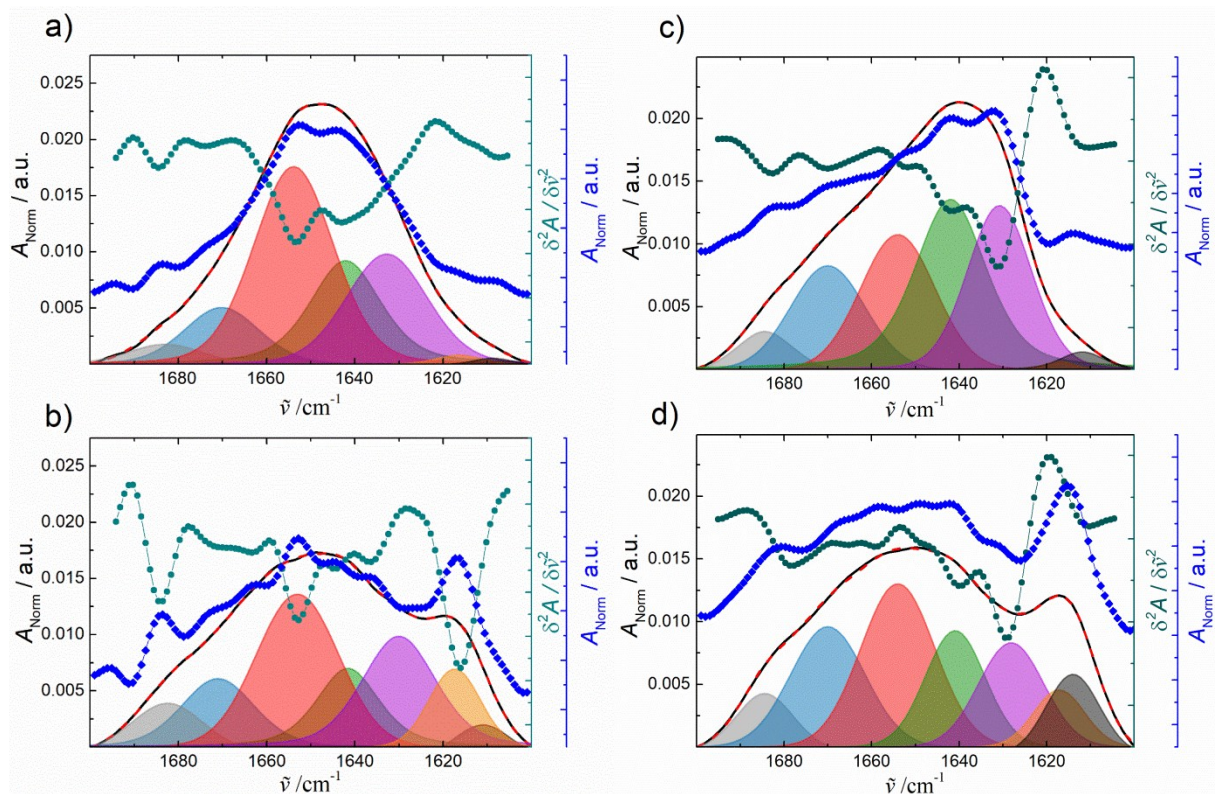

**Figure SI 1.** Curve fitting results of the temperature-dependent FTIR data of GroEL and GroES in neat buffer at ambient pressure: Amide I' band region (black line), the corresponding fit (red dashed line), FSD (blue dotted (square) line) and 2<sup>nd</sup> derivative spectra (dark cyan dotted line) of GroEL for 25 °C (a) and 86 °C (b) at ambient pressure and of GroES at 25 °C (c) and 96 °C (d) at ambient pressure: intermolecular  $\beta$ -sheets (grey), turns and loops (blue),  $\alpha$ -helices (red), random coils (green), intramolecular  $\beta$ -sheets (purple), intermolecular  $\beta$ -sheets (orange) and side chains (black).

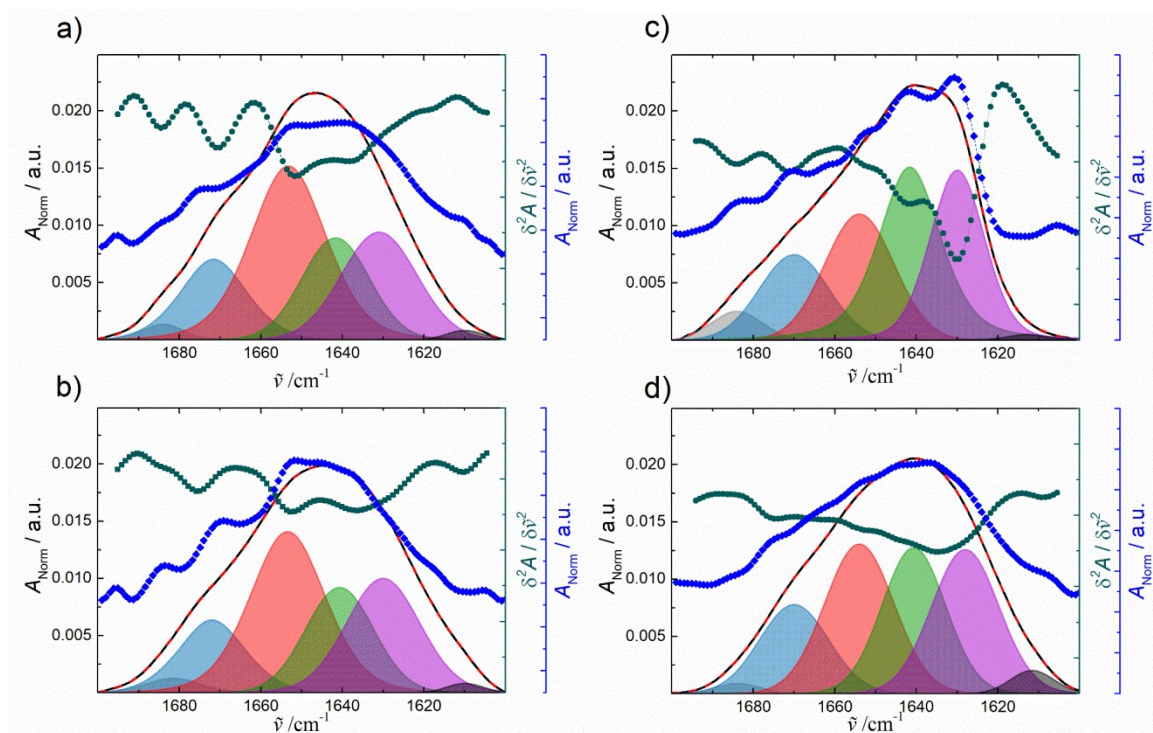

**Figure SI 2.** Curve fitting results of the pressure-dependent FTIR data of GroEL and GroES in neat buffer at 25 °C. Amide I' band region (black line), the corresponding fit (red dashed line), FSD (blue dotted (square) line) and 2<sup>nd</sup> derivative spectra (dark cyan dotted line) of GroEL for 1 bar (a) and 10 kbar (b) at 25 °C and of GroES for 1 bar (c) and 10 kbar (d) at 25 °C: intermolecular  $\beta$ -sheets (grey); turns and loops (blue);  $\alpha$ -helices (red); random coils (green); intramolecular  $\beta$ -sheets (purple) and side chains (black).

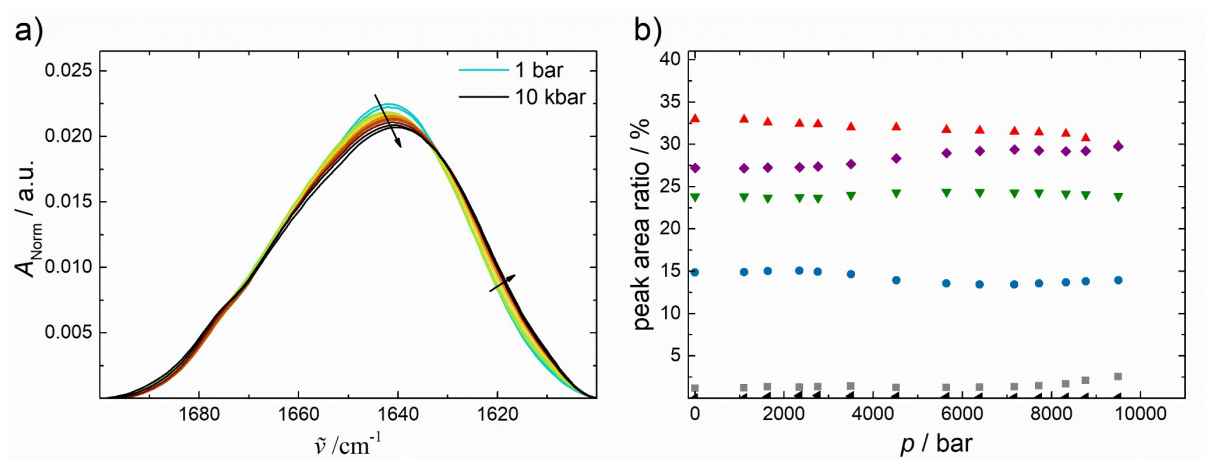

**Figure SI 3.** Pressure-dependent FTIR absorption data of the GroEL-GroES complex in neat buffer (buffer B + 3 mM ATP + 10 mM  $\text{Mg}^{2+}$ ) at 25 °C. a) Pressure-dependent changes of the normalized amide I' band region of the GroEL-GroES complex and b) corresponding changes in secondary structure elements by pressure: intermolecular  $\beta$ -sheets (1683  $\text{cm}^{-1}$ , grey); turns and loops (1672  $\text{cm}^{-1}$ , blue);  $\alpha$ -helices (1653  $\text{cm}^{-1}$ , red); random coils (1640  $\text{cm}^{-1}$ , green); intramolecular  $\beta$ -sheets (1632  $\text{cm}^{-1}$ , purple) and side chains (1610  $\text{cm}^{-1}$ , black).
